# Supplementary material for: In Situ Staining and Laser Capture Microdissection of Lymph Node Residing SIV Gag-Specific CD8+ T cells—A Tool to Interrogate a Functional Immune Response Ex Vivo
Source: PLoS One. 2016 Mar 17;11(3):e0149907. doi: 10.1371/journal.pone.0149907 (PMC4795610; doi:10.1371/journal.pone.0149907)
Supplement: S1 Table — (XLS) [file pone.0149907.s001.xls]

## Sheet: Sheet1
S1 Table. Differentially expressed genes between GagCM9+cellsSIV+RMs vs. CD8+cellsSIV+RMs
Gene Information			Kruskal-Wallis p values	Average Log2 Fold Change Values			Gene Expression Values
							CD8+ cellsSIV+RMs			CM9+ cellsSIV+RMs
Illumina ID	Gene Symbol	Definition	CM8 SIV+RMs vs. CM9 SIV+RMs	Avg CD8 SIV+RMs	Avg CM9 SIV+RM	Avg CM9 SIV+RMs - Avg CD8 SIV+RMs	A(Log2(Avg))	B(Log2(Avg))	C(Log2(Avg))	A(Log2(Avg))	B(Log2(Avg))	C(Log2(Avg))
ILMN_1806304	ENTPD4	Homo sapiens ectonucleoside triphosphate diphosphohydrolase 4 (ENTPD4), mRNA.	0.0479951	0.507164	-0.565015	-1.07218	-0.0502934	1.20003	0.371757	-0.365198	-0.650706	-0.679139
ILMN_1771203	SMAD2	Homo sapiens SMAD family member 2 (SMAD2), transcript variant 2, mRNA.	0.0369397	0.204553	-0.699062	-0.903615	0.39446	-0.181753	0.400952	-1.03472	-0.779871	-0.282595
ILMN_1660577	ATP5G2	Homo sapiens ATP synthase, H+ transporting, mitochondrial F0 complex, subunit c (subunit 9), isoform 2 (ATP5G2), nuclear gene encoding mitochondrial protein, transcript variant 2, mRNA.	0.0259858	0.178968	-0.588427	-0.767395	0.199067	0.419916	-0.0820784	-0.36543	-0.918061	-0.481791
ILMN_1689518	PECAM1	Homo sapiens platelet/endothelial cell adhesion molecule (PECAM1), mRNA.	0.0335022	0.246722	-0.497971	-0.744693	0.284418	0.0817318	0.374017	-0.0950729	-0.557131	-0.841709
ILMN_1656940	ABLIM3	Homo sapiens actin binding LIM protein family, member 3 (ABLIM3), mRNA.	0.00888304	0.282953	-0.434214	-0.717166	0.0138197	0.49636	0.338679	-0.49543	-0.471814	-0.335398
ILMN_1757794	BRWD3	Homo sapiens bromodomain and WD repeat domain containing 3 (BRWD3), mRNA.	0.00315958	0.304038	-0.394914	-0.698953	0.307242	0.472681	0.132192	-0.406535	-0.47459	-0.303617
ILMN_1674661	CIRBP	Homo sapiens cold inducible RNA binding protein (CIRBP), mRNA.	0.0337349	0.235979	-0.437046	-0.673026	0.10699	0.470478	0.13047	-0.427118	-0.747707	-0.136313
ILMN_1773307	NAP1L5	Homo sapiens nucleosome assembly protein 1-like 5 (NAP1L5), mRNA.	0.0147996	0.226964	-0.438275	-0.665239	0.469891	0.116611	0.0943897	-0.589847	-0.23136	-0.493617
ILMN_1697642	BCAP29	Homo sapiens B-cell receptor-associated protein 29 (BCAP29), transcript variant 1, mRNA.	0.0394704	0.266924	-0.386925	-0.653849	0.436907	0.225983	0.137882	0.00863436	-0.564547	-0.604862
ILMN_2195236	PGRMC2	Homo sapiens progesterone receptor membrane component 2 (PGRMC2), mRNA.	0.0239569	0.256115	-0.397163	-0.653278	0.0441052	0.538386	0.185854	-0.619002	-0.304293	-0.268194
ILMN_1749297	ACTL6A	Homo sapiens actin-like 6A (ACTL6A), transcript variant 2, mRNA.	0.026588	0.362127	-0.2847	-0.646826	0.399262	0.509502	0.177616	-0.525801	-0.350297	0.0219998
ILMN_1806320	PPFIBP1	Homo sapiens PTPRF interacting protein, binding protein 1 (liprin beta 1) (PPFIBP1), transcript variant 1, mRNA.	0.0422752	0.341627	-0.301812	-0.643439	0.564512	0.541352	-0.0809834	-0.330685	-0.380767	-0.193984
ILMN_1739821	EIF2S1	Homo sapiens eukaryotic translation initiation factor 2, subunit 1 alpha, 35kDa (EIF2S1), mRNA.	0.00243495	0.323213	-0.316852	-0.640064	0.289547	0.489929	0.190163	-0.255813	-0.326822	-0.367921
ILMN_1657509	TSEN54	Homo sapiens tRNA splicing endonuclease 54 homolog (S. cerevisiae) (TSEN54), mRNA.	0.000522158	0.268082	-0.34768	-0.615762	0.257155	0.34508	0.202011	-0.397259	-0.260434	-0.385347
ILMN_1798212	LLGL1	Homo sapiens lethal giant larvae homolog 1 (Drosophila) (LLGL1), mRNA.	0.0348284	0.26585	-0.349861	-0.615712	0.120107	0.620177	0.0572668	-0.339316	-0.496825	-0.213443
ILMN_1670215	FLJ46836	Homo sapiens FLJ46836 protein (FLJ46836), mRNA.	0.0466808	0.334785	-0.276028	-0.610813	0.270344	0.713803	0.0202075	-0.395884	-0.151064	-0.281137
ILMN_1661138	GON4L	Homo sapiens gon-4-like (C. elegans) (GON4L), transcript variant 1, mRNA.	0.00916054	0.256206	-0.348304	-0.60451	0.402119	0.355668	0.0108308	-0.300684	-0.414282	-0.329946
ILMN_2342084	BCAP29	Homo sapiens B-cell receptor-associated protein 29 (BCAP29), transcript variant 2, mRNA.	0.045667	0.242349	-0.358933	-0.601283	0.410897	0.211089	0.105061	0.0188373	-0.517392	-0.578246
ILMN_1727938	ZNF764	Homo sapiens zinc finger protein 764 (ZNF764), mRNA.	0.0385291	0.356231	-0.242261	-0.598492	0.444338	0.613313	0.0110417	-0.269621	-0.368108	-0.0890534
ILMN_1753755	B4GALT2	Homo sapiens UDP-Gal:betaGlcNAc beta 1,4- galactosyltransferase, polypeptide 2 (B4GALT2), transcript variant 2, mRNA.	0.012351	0.298201	-0.265448	-0.56365	0.269069	0.520862	0.104673	-0.291951	-0.172375	-0.332019
ILMN_2338997	PTP4A2	Homo sapiens protein tyrosine phosphatase type IVA, member 2 (PTP4A2), transcript variant 2, mRNA. XM_944930 XM_944934	0.0164368	0.217736	-0.306186	-0.523922	0.33907	0.217148	0.0969916	-0.522454	-0.246267	-0.149836
ILMN_1718558	PARP12	Homo sapiens poly (ADP-ribose) polymerase family, member 12 (PARP12), mRNA.	0.0355763	0.26225	-0.231655	-0.493906	0.429593	0.329012	0.0281466	-0.37766	-0.0336385	-0.283667
ILMN_2122511	CCBE1	Homo sapiens collagen and calcium binding EGF domains 1 (CCBE1), mRNA.	0.0383016	0.145422	-0.343047	-0.488469	0.293442	0.0799372	0.0628877	-0.0615597	-0.521034	-0.446548
ILMN_1677534	SCAP	Homo sapiens SREBF chaperone (SCAP), mRNA.	0.0281569	0.198294	-0.289729	-0.488023	0.0430771	0.243426	0.30838	-0.131403	-0.210299	-0.527484
ILMN_2188119	ARL16	Homo sapiens ADP-ribosylation factor-like 16 (ARL16), mRNA.	0.0263886	0.165987	-0.311403	-0.47739	0.175562	0.221688	0.100711	-0.0464474	-0.404764	-0.482997
ILMN_1724490	PSPC1	Homo sapiens paraspeckle component 1 (PSPC1), transcript variant beta, transcribed RNA.	0.00138218	0.131125	-0.342896	-0.474022	0.211617	0.0582417	0.123518	-0.283664	-0.419612	-0.325413
ILMN_1809437	RHBDD2	Homo sapiens rhomboid domain containing 2 (RHBDD2), transcript variant 1, mRNA.	0.0341709	0.0483764	-0.424945	-0.473322	0.157056	0.157357	-0.169283	-0.219657	-0.515325	-0.539855
ILMN_1810176	MAP3K7	Homo sapiens mitogen-activated protein kinase kinase kinase 7 (MAP3K7), transcript variant B, mRNA.	0.0448119	0.102877	-0.355865	-0.458742	-0.107166	0.0204073	0.39539	-0.371808	-0.434197	-0.261589
ILMN_2273882	RNF38	Homo sapiens ring finger protein 38 (RNF38), transcript variant 5, mRNA.	0.030632	0.232898	-0.216374	-0.449272	0.253391	0.429961	0.0153426	-0.233089	-0.0942606	-0.321773
ILMN_2362858	PILRA	Homo sapiens paired immunoglobin-like type 2 receptor alpha (PILRA), transcript variant 2, mRNA.	0.0144416	0.176625	-0.267688	-0.444313	0.232744	0.18741	0.10972	-0.0672852	-0.393484	-0.342295
ILMN_1748831	PPP1R13B	Homo sapiens protein phosphatase 1, regulatory (inhibitor) subunit 13B (PPP1R13B), mRNA.	0.00729723	0.137792	-0.303662	-0.441455	0.00317663	0.280771	0.12943	-0.243481	-0.365529	-0.301977
ILMN_1658504	CHKA	Homo sapiens choline kinase alpha (CHKA), transcript variant 2, mRNA.	0.0028938	0.216893	-0.22217	-0.439062	0.170098	0.236512	0.244068	-0.295239	-0.275284	-0.0959857
ILMN_1785703	LMOD3	Homo sapiens leiomodin 3 (fetal) (LMOD3), mRNA.	0.00720001	0.200096	-0.23603	-0.436126	0.159859	0.346829	0.0936008	-0.210442	-0.181117	-0.316532
ILMN_2386732	RCHY1	Homo sapiens ring finger and CHY zinc finger domain containing 1 (RCHY1), transcript variant 3, mRNA.	0.0385648	0.163662	-0.268003	-0.431665	0.0132764	0.440197	0.0375126	-0.209679	-0.32182	-0.272509
ILMN_1725031	LHFPL1	Homo sapiens lipoma HMGIC fusion partner-like 1 (LHFPL1), mRNA.	0.0476951	0.246467	-0.183861	-0.430327	0.203442	0.503819	0.0321382	-0.311191	-0.0966512	-0.143741
ILMN_2255579	RAB37	Homo sapiens RAB37, member RAS oncogene family (RAB37), transcript variant 3, mRNA.	0.041332	0.174063	-0.254326	-0.428389	0.390055	-0.0151516	0.147284	-0.0969147	-0.382408	-0.283656
ILMN_1739558	CRELD1	Homo sapiens cysteine-rich with EGF-like domains 1 (CRELD1), transcript variant 1, mRNA.	0.00714476	0.0714743	-0.347716	-0.41919	-0.0847893	0.145494	0.153719	-0.312153	-0.330111	-0.400884
ILMN_2330552	CDC2L2	Homo sapiens cell division cycle 2-like 2 (PITSLRE proteins) (CDC2L2), transcript variant 5, mRNA.	0.0118143	0.142616	-0.270451	-0.413067	0.210262	0.0536092	0.163976	-0.122733	-0.405622	-0.282998
ILMN_1680246	MAT2B	Homo sapiens methionine adenosyltransferase II, beta (MAT2B), transcript variant 1, mRNA.	0.0259313	0.143391	-0.266859	-0.41025	0.305799	-0.0683322	0.192707	-0.347993	-0.203079	-0.249504
ILMN_1657680	CCDC69	Homo sapiens coiled-coil domain containing 69 (CCDC69), mRNA.	0.0186383	0.226576	-0.175611	-0.402187	0.227362	0.40663	0.045736	-0.200319	-0.154115	-0.1724
ILMN_1664833	MRPL50	Homo sapiens mitochondrial ribosomal protein L50 (MRPL50), nuclear gene encoding mitochondrial protein, mRNA.	0.0422887	-0.366302	0.0355611	0.401863	-0.465672	-0.419769	-0.213465	-0.136722	-0.00340843	0.246814
ILMN_1784037	ZBTB40	Homo sapiens zinc finger and BTB domain containing 40 (ZBTB40), transcript variant 1, mRNA.	0.00327498	-0.30198	0.109918	0.411898	-0.237299	-0.359343	-0.3093	0.148843	0.179834	0.00107494
ILMN_1654858	ZNF818	Homo sapiens zinc finger protein 818 (ZNF818), mRNA.	0.0240604	-0.247125	0.165896	0.413021	-0.329589	-0.203861	-0.207926	0.218076	0.323494	-0.0438822
ILMN_1768505	IL13RA1	Homo sapiens interleukin 13 receptor, alpha 1 (IL13RA1), mRNA.	0.0473213	-0.248165	0.17011	0.418275	-0.160783	-0.33065	-0.253062	0.123469	0.431441	-0.044579
ILMN_1728779	NGLY1	Homo sapiens N-glycanase 1 (NGLY1), mRNA.	0.000161519	-0.331688	0.0885533	0.420242	-0.356206	-0.327931	-0.310928	0.138044	0.0847138	0.0429017
ILMN_1736103	ITPR2	Homo sapiens inositol 1,4,5-triphosphate receptor, type 2 (ITPR2), mRNA.	0.0432189	-0.338879	0.0953568	0.434236	-0.344234	-0.399124	-0.273278	-0.128134	0.364826	0.0493782
ILMN_2396648	EXOSC1	Homo sapiens exosome component 1 (EXOSC1), mRNA. XM_944315 XM_944318 XM_944323	0.0278733	-0.25802	0.182294	0.440314	-0.348374	-0.307085	-0.118601	0.0617177	0.401029	0.0841335
ILMN_2237428	SCD5	Homo sapiens stearoyl-CoA desaturase 5 (SCD5), transcript variant 1, mRNA.	0.0422408	-0.479279	-0.0305835	0.448696	-0.350989	-0.491955	-0.594893	0.141234	-0.296979	0.0639946
ILMN_1779381	SEC61A2	Homo sapiens Sec61 alpha 2 subunit (S. cerevisiae) (SEC61A2), mRNA.	0.0300766	-0.26502	0.184905	0.449926	-0.219335	-0.340601	-0.235125	0.063142	0.446965	0.0446088
ILMN_1671257	DKC1	Homo sapiens dyskeratosis congenita 1, dyskerin (DKC1), mRNA.	0.0456434	-0.275265	0.179485	0.454749	-0.301613	-0.472122	-0.0520591	0.0364804	0.375675	0.126299
ILMN_1679782	BLOC1S2	Homo sapiens biogenesis of lysosome-related organelles complex-1, subunit 2 (BLOC1S2), transcript variant 2, mRNA.	0.00205687	-0.358268	0.101747	0.460015	-0.364257	-0.398963	-0.311584	0.137208	-0.0141906	0.182223
ILMN_2332795	ZNF16	Homo sapiens zinc finger protein 16 (ZNF16), transcript variant 1, mRNA.	0.0273716	-0.264832	0.20516	0.469992	-0.158352	-0.138745	-0.497398	0.151316	0.111188	0.352977
ILMN_2365686	ALG8	Homo sapiens asparagine-linked glycosylation 8 homolog (S. cerevisiae, alpha-1,3-glucosyltransferase) (ALG8), transcript variant 2, mRNA.	0.0303347	-0.344178	0.128528	0.472706	-0.305212	-0.208988	-0.518333	0.295477	0.172032	-0.0819243
ILMN_2116556	LSM5	Homo sapiens LSM5 homolog, U6 small nuclear RNA associated (S. cerevisiae) (LSM5), mRNA.	0.032217	-0.369301	0.113402	0.482703	-0.295697	-0.62573	-0.186475	0.246844	0.00574322	0.0876201
ILMN_2383124	CYP2D6	Homo sapiens cytochrome P450, family 2, subfamily D, polypeptide 6 (CYP2D6), transcript variant 1, mRNA.	0.0487666	-0.371069	0.132416	0.503485	-0.201246	-0.42129	-0.49067	-0.175665	0.232419	0.340494
ILMN_2394161	ST8SIA4	Homo sapiens ST8 alpha-N-acetyl-neuraminide alpha-2,8-sialyltransferase 4 (ST8SIA4), transcript variant 2, mRNA.	0.0169427	-0.342226	0.162694	0.504919	-0.332799	-0.319637	-0.374241	0.18324	-0.0669194	0.371761
ILMN_1722059	SAFB	Homo sapiens scaffold attachment factor B (SAFB), mRNA.	0.0212046	-0.302148	0.210699	0.512847	-0.410525	-0.0614076	-0.434511	0.33074	0.212703	0.0886539
ILMN_1703844	DYNC1LI1	Homo sapiens dynein, cytoplasmic 1, light intermediate chain 1 (DYNC1LI1), mRNA.	0.0477299	-0.341589	0.172912	0.514501	-0.0370825	-0.649796	-0.337888	0.0869748	0.198154	0.233608
ILMN_1769637	RNMT	Homo sapiens RNA (guanine-7-) methyltransferase (RNMT), mRNA.	0.0313014	-0.342818	0.188193	0.53101	-0.286154	-0.587878	-0.154421	0.0650822	0.388373	0.111123
ILMN_2112357	CD300LF	Homo sapiens CD300 molecule-like family member f (CD300LF), mRNA.	0.0145555	-0.308057	0.229878	0.537935	-0.307131	-0.217124	-0.399915	0.450738	0.0414331	0.197464
ILMN_1715607	CHMP4A	Homo sapiens chromatin modifying protein 4A (CHMP4A), mRNA.	0.015596	-0.337432	0.204206	0.541639	-0.358581	-0.393839	-0.259878	0.00704133	0.443961	0.161617
ILMN_2096191	AASDHPPT	Homo sapiens aminoadipate-semialdehyde dehydrogenase-phosphopantetheinyl transferase (AASDHPPT), mRNA.	0.0367415	-0.422645	0.130825	0.55347	-0.236013	-0.732025	-0.299897	0.220087	-0.0470652	0.219453
ILMN_1701134	PTEN	Homo sapiens phosphatase and tensin homolog (PTEN), mRNA.	0.0298233	-0.419809	0.138384	0.558193	-0.311412	-0.616945	-0.33107	0.239495	-0.132896	0.308553
ILMN_2356838	CEPT1	Homo sapiens choline/ethanolamine phosphotransferase 1 (CEPT1), transcript variant 1, mRNA.	0.0191119	-0.435369	0.132055	0.567424	-0.384213	-0.607989	-0.313905	-0.00385406	0.0283365	0.371682
ILMN_2219712	HMGB2	Homo sapiens high-mobility group box 2 (HMGB2), mRNA.	0.0406324	-0.343455	0.229809	0.573264	-0.247366	-0.510644	-0.272355	-0.00295283	0.124675	0.567704
ILMN_1781285	DUSP1	Homo sapiens dual specificity phosphatase 1 (DUSP1), mRNA.	0.0116401	-0.315473	0.259375	0.574848	-0.282319	-0.355399	-0.308701	0.118904	0.516444	0.142778
ILMN_1737195	CENPK	Homo sapiens centromere protein K (CENPK), mRNA.	0.0261653	-0.423665	0.16885	0.592515	-0.363734	-0.657233	-0.250027	-0.0742609	0.306239	0.274572
ILMN_2073289	MTSS1	Homo sapiens metastasis suppressor 1 (MTSS1), mRNA.	0.00625441	-0.57182	0.0845229	0.656343	-0.438456	-0.652526	-0.624479	-0.00420411	0.294021	-0.0362479
ILMN_2190598	FGD6	Homo sapiens FYVE, RhoGEF and PH domain containing 6 (FGD6), mRNA.	0.0356349	-0.463633	0.217756	0.681389	-0.473466	-0.477296	-0.440137	-0.213556	0.492033	0.374792
ILMN_1781795	ERH	Homo sapiens enhancer of rudimentary homolog (Drosophila) (ERH), mRNA.	0.0132856	-0.576569	0.105211	0.68178	-0.392475	-0.687609	-0.649624	0.366435	-0.0515913	0.00078746
ILMN_1809477	CARHSP1	Homo sapiens calcium regulated heat stable protein 1, 24kDa (CARHSP1), transcript variant 2, mRNA.	0.0269449	-0.343438	0.339827	0.683265	-0.622736	-0.110439	-0.297137	0.0894151	0.542244	0.387823
ILMN_2320853	UBE2D3	Homo sapiens ubiquitin-conjugating enzyme E2D 3 (UBC4/5 homolog, yeast) (UBE2D3), transcript variant 6, mRNA.	0.0221648	-0.516701	0.16744	0.684141	-0.566178	-0.813102	-0.170822	0.141441	0.213638	0.147243
ILMN_1718830	NARG2	Homo sapiens NMDA receptor regulated 2 (NARG2), transcript variant 1, mRNA.	0.019233	-0.477451	0.214572	0.692023	-0.126859	-0.698154	-0.60734	0.154273	0.298857	0.190587
ILMN_1694219	ARIH1	Homo sapiens ariadne homolog, ubiquitin-conjugating enzyme E2 binding protein, 1 (Drosophila) (ARIH1), mRNA.	0.0267553	-0.524358	0.170073	0.694431	-0.525947	-0.576413	-0.470714	0.416756	0.320922	-0.227459
ILMN_2373495	H2AFY	Homo sapiens H2A histone family, member Y (H2AFY), transcript variant 2, mRNA.	0.0275693	-0.486368	0.210711	0.697079	-0.304232	-0.259437	-0.895434	0.23117	0.225927	0.175037
ILMN_1773847	DYNC1I2	Homo sapiens dynein, cytoplasmic 1, intermediate chain 2 (DYNC1I2), mRNA.	0.0121363	-0.486141	0.249005	0.735147	-0.269266	-0.652375	-0.536783	0.495333	0.0874805	0.164202
ILMN_1813657	PHF20	Homo sapiens PHD finger protein 20 (PHF20), mRNA.	0.0193482	-0.540236	0.205789	0.746025	-0.465909	-0.753296	-0.401503	0.398158	-0.122115	0.341322
ILMN_1800855	PPTC7	Homo sapiens PTC7 protein phosphatase homolog (S. cerevisiae) (PPTC7), mRNA.	0.0360445	-0.479489	0.284781	0.76427	-0.568714	-0.556307	-0.313446	-0.165646	0.415797	0.604191
ILMN_2347807	EXOC1	Homo sapiens exocyst complex component 1 (EXOC1), transcript variant 1, mRNA.	0.00350594	-0.541933	0.266389	0.808323	-0.638626	-0.547579	-0.439595	0.353601	0.0333764	0.412191
ILMN_2208903	CD52	Homo sapiens CD52 molecule (CD52), mRNA.	0.0263221	-0.673117	0.23709	0.910206	-0.614431	-0.750808	-0.654112	-0.283312	0.543564	0.451017
ILMN_2242463	CTSC	Homo sapiens cathepsin C (CTSC), transcript variant 1, mRNA.	0.0194587	-0.632548	0.320661	0.953209	-0.208036	-0.880759	-0.80885	0.412715	0.0553096	0.493958
ILMN_1751378	RARS	Homo sapiens arginyl-tRNA synthetase (RARS), mRNA.	0.00160935	-0.554959	0.400577	0.955537	-0.516457	-0.638342	-0.51008	0.330846	0.63183	0.239055
ILMN_2410523	DDR2	Homo sapiens discoidin domain receptor tyrosine kinase 2 (DDR2), transcript variant 2, mRNA.	0.00818935	-0.768654	0.245933	1.01459	-0.865637	-0.908675	-0.531648	0.125771	0.582627	0.0294012
ILMN_1784822	PPP1R3F	Homo sapiens protein phosphatase 1, regulatory (inhibitor) subunit 3F (PPP1R3F), mRNA.	0.0226672	-0.812832	0.328083	1.14091	-0.566516	-1.19747	-0.674504	-0.154327	0.679501	0.459075
